# Supplementary material for: PolyUbiquitin Chain Linkage Topology Selects the Functions from the Underlying Binding Landscape
Source: PLOS journal article supplement (doi:10.1371/journal.pcbi.1003691), 2014-07-03
Supplement: S18 (10.1371/journal.pcbi.1003691.s018) [file journal.pcbi.1003691.s018]

# Text S1: Polyubiquitin Chain Linkage Topology Selects the Functions From the Underlying Binding Landscape

Yong Wang <sup>\*</sup>, Chun Tang <sup>†</sup>, Erkang Wang <sup>\*</sup>, and Jin Wang <sup>\* ‡ §</sup>

<sup>\*</sup>State Key Laboratory of Electroanalytical Chemistry, Changchun Institute of Applied Chemistry, Chinese Academy of Sciences, Changchun, Jilin, 130022, P.R. China, <sup>†</sup>CAS Key Laboratory of Magnetic Resonance in Biological Systems, State Key Laboratory of Magnetic Resonance and Atomic and Molecular Physics, Wuhan Institute of Physics and Mathematics, Chinese Academy of Sciences, Wuhan, Hubei 430071, China, <sup>‡</sup>College of Physics, Jilin University, Changchun, Jilin, P.R. China, and <sup>§</sup>Department of Chemistry and Physics, State University of New York at Stony Brook, Stony Brook, New York 11794-3400, USA

Submitted to PLOS Computational Biology

**Estimation of disassociation constant.** To estimate the equilibrium disassociation constant  $K_D$  reflecting binding affinity between Ub monomers, we consider two-state kinetics for the formation of the Ub dimer at equilibrium, which may be expressed as,

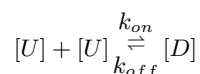

where  $k_{on}$  is the second-order rate constant as the association rate, while  $k_{off}$  is the first order rate constant for the dissociation. The ratio between the two rate constants yields the equilibrium disassociation constant  $k_D$  (has units of concentration) given by:

$$\begin{aligned} k_D &= \frac{k_{off}}{k_{on}} = \frac{[U] * [U]}{[D]} \\ &= \frac{P_f^2}{0.5(1 - P_f)} * [U_0] \\ &= \frac{2P_f^2}{1 - P_f} * \frac{1}{V} \\ &\approx \frac{2P_f^2}{1 - P_f} \frac{400}{R^3} [M] \end{aligned}$$

We define the concentration of free Ub as  $[U_f]$ , so total Ub concentration  $[U_0] = [U_f] + 2[D]$ .  $P_f = \frac{[U_f]}{[U_0]}$  is the population of free Ub, then  $[D] = 0.5(1 - P_f)$ .  $R$  in unit of  $\text{\AA}$  is radius of the effective simulation spherical box.  $\frac{400}{R^3}$  in the equation is a result of unit conversion from  $1\text{molecule}/\text{\AA}^3$  to  $1\text{mol}/L$ . After the parameter calibration, the binding affinity was estimated to be between 0.6 and 1.9 mM which is about 2.5 times stronger than experimental measurement. Considering that the estimation of  $[U_0]$  does not take into account the excluded volume of Ubs themselves, the accurate value of  $k_D$  should be slightly higher than the current value. In total, the binding affinity in simulation is reasonable consistent with experimental measurement.

**Entropy reduction estimation by a polymer theory.** The free energy contribution of enthalpy term resulted from bond constraint can be estimated to be about  $2.2k_B T$  given that the energy parameter in our model for a typical contact is 0.92KJ/mol and the simulation temperature is 50K. Then we applied a polymer theory (1) to estimate the free energy contribution of entropy reduction resulted from the introduction of an iso-peptide bond between two Ub units by the expression:  $-\ln(p(u))$  (in unit of  $k_B T$ ). Here,  $p(u) = (\frac{3\mu}{4\pi N})^{\frac{3}{2}} \frac{4\pi}{3} (\frac{I}{b})^3$  is the average probability to form a bond/contact constraint with  $\mu$  contacts/bonds already present, where  $N$  is the residue number,  $b$  is the persistent length of a peptide chain, and  $I$  is the length of the bonded constraint. For our case,  $N=152$  and  $I=4.0\text{\AA}$ .

Figure S4 shows  $p(\mu, b)$  as a function of  $\mu$  and  $b$ .  $\mu$  was varied from 1 to 59. Note that 59 is the number of interfacial contacts in closed diUb (PDB 1AAR) representing the upper limitation.  $b$  was varied from 6 to 14  $\text{\AA}$ , considering that a typical  $b$  for polyethylene is 14 and a typical  $b$  for Ub is 12 (2). The plot leads to a robust observation that the entropic contribution is larger than the enthalpic contribution. In contrast to the free model, the only difference of the linkage models is an extra bond constraint. In total, the quantified analysis based on polymer theory supports that the impact of the bonded constraint on the free energy landscape of diUbs is mainly entropic rather than enthalpic.

To further quantify the impact of bonded constraints on different linkage types, we performed a detailed analysis of entropy-enthalpy compensation of all 9 models. We calculated the entropic term  $TS(x)$  by  $\langle E_I \rangle(x) - F(x)$ . Note that  $\langle E_I \rangle(x)$  and  $F(x)$  are the interfacial energy profile and the free energy profile as a function of the binding reaction coordinate  $x$ , respectively. To check the robustness, we used three order parameters  $R_{COM}$ ,  $R_{I36I36}$ , and  $R_{I44I44}$  as the binding reaction coordinates. The results are shown in Fig. S5-7. To quantify the contribution of entropy and enthalpy to the free energy landscape, we performed correlation coefficient analysis, as shown in Table S5.

1. Plotkin, S. S., Wang, J., & Wolynes, P. G. (1996) Correlated energy landscape model for finite, random heteropolymers Phys Rev E 53, 6271.

2. Gräter, F., Heider, P., Zangi, R., & Berne, B. (2008) Dissecting entropic coiling and poor solvent effects in protein collapse J Am Chem Soc 130, 11578–11579.

Reserved for Publication Footnotes

**Table S1: Experimental Structures of diUbs**

| Linkage Type | PDB                                                  | Structure                                                      | Reference                                                                                    |
|--------------|------------------------------------------------------|----------------------------------------------------------------|----------------------------------------------------------------------------------------------|
| M1           | 2W9N<br>3AXC                                         | open<br>compact                                                | Komander2009<br>Rohain2012                                                                   |
| K6           | 2XK5, 3ZIZ <sup>a</sup>                              | compact <sup>e</sup>                                           | Virdee2010, Hospenthal2013                                                                   |
| K11          | 3NOB <sup>b</sup> , 2XEW <sup>c</sup>                | compact <sup>e</sup>                                           | Matsumoto2010, Bremm2010                                                                     |
| K27          | No available structure                               |                                                                |                                                                                              |
| K29          | No available structure                               |                                                                |                                                                                              |
| K33          | No available structure                               |                                                                |                                                                                              |
| K48          | 1F9J<br>2PE9<br>1TBE, 3AUL, 3NS8<br>1AAR, 2PEA, 2BGF | open<br>compact <sup>f</sup><br>compact<br>closed <sup>g</sup> | Philips2001<br>Ryabov2007<br>Cook1994, Hirano2011, Lai2012<br>Cook1992, Ryabov2007, DijK2005 |
| K63          | 3H7P, 2JF5 <sup>d</sup><br>3DVG                      | open<br>compact                                                | Weeks2009, Komander2009<br>Newton2008                                                        |

<sup>a</sup> A mirror structure of 2XK5.

<sup>b</sup> A and B chains of 3NOB.

<sup>c</sup> J and K chains of 2XEW, similar to 3NOB.

<sup>d</sup> A mirror structure of 3H7P.

<sup>e</sup> Interface formed between I36 patch of distal Ub and I36 patch of proximal Ub.

<sup>f</sup> Interface formed between I36 patch of distal Ub and I44 patch of proximal Ub.

<sup>g</sup> Interface formed between I44 patch of distal Ub and I44 patch of proximal Ub.

**Table S2: Theoretical Models for Different Ub Systems**

| Theoretical Model | Description <sup>a</sup>                                                                                                 |
|-------------------|--------------------------------------------------------------------------------------------------------------------------|
| Free              | No linkage between Ub units which are modeled by SBM                                                                     |
| CGK6              | add an isopeptide bond between G76 and K6                                                                                |
| CGK11             | add an isopeptide bond between G76 and K11                                                                               |
| CGK27             | add an isopeptide bond between G76 and K27                                                                               |
| CGK29             | add an isopeptide bond between G76 and K29                                                                               |
| CGK33             | add an isopeptide bond between G76 and K33                                                                               |
| CGK48             | add an isopeptide bond between G76 and K48                                                                               |
| CGK63             | add an isopeptide bond between G76 and K63                                                                               |
| CGM1              | add a peptide bond between G76 of distal Ub and M1 of proximal Ub,<br>and additional bond angle and dihedral angle terms |

<sup>a</sup> an isopeptide bond is formed between a carboxyl group of Ub G76 (distal Ub) and an  $\epsilon$ -amino group of another Ub's lysine (proximal Ub).

**Table S3: Pre-existence of X-ray or NMR structures of diUbs on the binding landscape of free Ub monomers**

| Model | X-ray or NMR structure    | Linkage | Minimal RMSD <sup>a</sup> | State            |
|-------|---------------------------|---------|---------------------------|------------------|
| Free  | 3AXC                      | M1      | 0.25                      | compact          |
|       | 2XK5                      | K6      | 0.17                      | compact, I44-I36 |
|       | 2XK5-Mirror <sup>b</sup>  | K6      | 0.21                      | compact, I36-I44 |
|       | 2XEW or 3NOB <sup>c</sup> | K11     | 0.15                      | compact, I36-I36 |
|       | 1AAR or 2PEA <sup>d</sup> | K48     | 0.26                      | closed, I44-I44  |
|       | 1TBE <sup>e</sup>         | K48     | 0.35                      | compact          |
|       | 3AUL <sup>e</sup>         | K48     | 0.35                      | compact          |
|       | 3NS8 <sup>e</sup>         | K48     | 0.34                      | compact          |
|       | 2W9N                      | M1      | 0.16                      | open             |
|       | 3DVG                      | K63     | 0.32                      | open             |
|       | 3H7P                      | K63     | 0.21                      | open             |

<sup>a</sup> in unit of nm.

<sup>b</sup> The mirror structure of 2XK5 was modeled from 3ZLZ which has an interface formed between I36 patch of distal Ub and I44 patch of proximal Ub.

<sup>c</sup> Conformation of 3NOB (A and B chains) is similar to that of 2XEW (J and K chains).

<sup>d</sup> We only measured the RMSD to 1AAR due to the similarity between the conformation of 2PEA and that of 1AAR.

<sup>e</sup> Conformations of 1TBE, 3AUL and 3NS8 are similar.

**Table S4: Structure prediction by different linkage models**

| Model | X-ray or NMR structure             | Minimal RMSD      | Linkage         | State            |
|-------|------------------------------------|-------------------|-----------------|------------------|
| CGK48 | 1AAR, 2PEA                         | 0.16              | K48             | closed, I44-I44  |
|       | 1F9J                               | 0.18              | K48             | open             |
|       | 1TBE                               | 0.25              | K48             | compact          |
|       | 3AUL                               | 0.25              | K48             | compact          |
|       | 3NS8                               | 0.25              | K48             | compact          |
|       | 2XK5                               | 0.10              | K6              | compact, I36-I44 |
|       | 3NOB                               | 0.67              | K11             | compact, I36-I36 |
| CGK63 | 3H7P                               | 0.15              | K63             | open             |
|       | 2JF5                               | 0.13              | K63             | open             |
|       | 3DVG                               | 0.14              | K63             | compact          |
|       | 3AXC                               | 0.21              | M1 <sup>a</sup> | compact          |
|       | 2W9N                               | 0.12              | M1 <sup>a</sup> | open             |
| CGM1  | 3AXC                               | 0.14              | M1              | compact          |
|       | 2W9N                               | 0.11              | M1              | open             |
|       | 3H7P                               | 0.14              | K63             | open             |
|       | 2JF5                               | 0.15              | K63             | open             |
|       | 3DVG                               | 0.25              | K63             | compact          |
| CGK11 | 3NOB or 2XEW                       | 0.11              | K11             | compact, I36-I36 |
|       | 2XK5                               | 0.29              | K6              | compact, I44-I36 |
| CGK6  | 2XK5                               | 0.29              | K6              | compact, I44-I36 |
|       | 3NOB                               | 0.18              | K11             | compact, I36-I36 |
|       | 1AAR                               | 0.26              | K48             | closed, I44-I44  |
| CGK27 | No Available Structure of K27-diUb |                   |                 |                  |
|       | 2XK5                               | 0.44              | K6              | compact, I44-I36 |
|       | 3NOB                               | 0.49              | K11             | compact, I36-I36 |
|       | 1AAR                               | 0.25              | K48             | closed, I44-I44  |
| CGK29 | No Available Structure of K29-diUb |                   |                 |                  |
|       | 2XK5                               | 0.39              | K6              | compact, I44-I36 |
|       | 3NOB                               | 0.47              | K11             | compact, I36-I36 |
|       | 1AAR                               | 0.84              | K48             | closed, I44-I44  |
| CGK33 | No Available Structure of K33-diUb |                   |                 |                  |
|       | 2XK5                               | 0.15 <sup>b</sup> | K6              | compact, I44-I36 |
|       | 3NOB                               | 0.12 <sup>b</sup> | K11             | compact, I36-I36 |
|       | 1AAR                               | 0.73              | K48             | closed, I44-I44  |

<sup>a</sup> K63- and linear diUb can sample the similar conformation space.

<sup>b</sup> We predicted that K33-diUb can form the conformations similar to the compact structures of K6- and K11-diUb.

**Table S5. Correlation Coefficient Analysis**

| Correlation Coefficient between Free Energy and Entropy (CC <sub>FS</sub> )  |                  |                     |                     |
|------------------------------------------------------------------------------|------------------|---------------------|---------------------|
| Model                                                                        | R <sub>COM</sub> | R <sub>I44I44</sub> | R <sub>I36I36</sub> |
| Free                                                                         | 0.29             | 0.18                | 0.37                |
| M1                                                                           | 0.91             | 0.95                | 0.94                |
| K6                                                                           | 0.42             | 0.52                | 0.49                |
| K11                                                                          | 0.49             | 0.44                | 0.27                |
| K27                                                                          | 0.85             | 0.77                | 0.87                |
| K29                                                                          | 0.92             | 0.89                | 0.94                |
| K33                                                                          | 0.58             | 0.58                | 0.51                |
| K48                                                                          | 0.51             | 0.37                | 0.67                |
| K63                                                                          | 0.88             | 0.95                | 0.94                |
|                                                                              |                  |                     |                     |
| Correlation Coefficient between Free Energy and Enthalpy (CC <sub>FE</sub> ) |                  |                     |                     |
| Model                                                                        | R <sub>COM</sub> | R <sub>I44I44</sub> | R <sub>I36I36</sub> |
| Free                                                                         | 0.41             | 0.44                | 0.35                |
| M1                                                                           | 0.08             | 0.29                | 0.35                |
| K6                                                                           | 0.89             | 0.89                | 0.72                |
| K11                                                                          | 0.74             | 0.85                | 0.68                |
| K27                                                                          | 0.06             | 0.06                | 0.58                |
| K29                                                                          | 0.26             | 0.09                | 0.30                |
| K33                                                                          | 0.51             | 0.03                | 0.09                |
| K48                                                                          | 0.53             | 0.56                | 0.06                |
| K63                                                                          | 0.18             | 0.07                | 0.22                |
